# Supplementary material
Source: HighWire-hosted journal article supplement (https://care.diabetesjournals.org/content/suppl/2005/12/23/29.1.113)
Supplement: PladevallPg113Appendix.pdf [file PladevallPg113Appendix.pdf]

## Appendix 1. Description and results from previous exploratory factor analyses of the Metabolic Syndrome

| <b>Study (reference #)</b> | <b>Design, Location, Population</b>                                                                                                                                                                                   | <b>Exclusion criteria</b>                                   | <b>Variables studied</b>                                                                                                                                                                                  | <b>Factor analysis methods</b>                                                                                                                                                                                                 | <b>Factors (components) [cumulative variance explained]</b>                                                                                                                                                                                                                                                                           |
|----------------------------|-----------------------------------------------------------------------------------------------------------------------------------------------------------------------------------------------------------------------|-------------------------------------------------------------|-----------------------------------------------------------------------------------------------------------------------------------------------------------------------------------------------------------|--------------------------------------------------------------------------------------------------------------------------------------------------------------------------------------------------------------------------------|---------------------------------------------------------------------------------------------------------------------------------------------------------------------------------------------------------------------------------------------------------------------------------------------------------------------------------------|
| Edwards et al (1)          | <ul style="list-style-type: none"> <li>• Cross-Sectional</li> <li>• California (USA)</li> <li>• Females (N=281)</li> <li>• Mean age 50</li> <li>• 90% White</li> </ul>                                                | Diabetes, missing data, medications for high blood pressure | BMI, waist circumference, WHR, fasting and post glucose challenge plasmatic glucose and insulin, plasmatic lipid measurements including LDL peak particle diameter (LDL-PPD), blood pressure measurements | <ul style="list-style-type: none"> <li>• Principal components</li> <li>• Varimax (orthogonal) rotation</li> <li>• Factor loading threshold 0.40</li> <li>• Components with eigenvalues greater than 1 were included</li> </ul> | <ol style="list-style-type: none"> <li>1. Fat distribution (Body weight, waist circumference, fasting insulin and glucose)</li> <li>2. Insulin/Glucose (fasting and post challenge glucose and insulin, systolic blood pressure)</li> <li>3. Lipid (High LDL-PPD, High Triglycerides and low HDL-Cholesterol)</li> </ol> <p>[66%]</p> |
| Edwards et al (2)          | <ul style="list-style-type: none"> <li>• Cross-Sectional</li> <li>• Hawaii (USA)</li> <li>• Elderly Japanese-American Men (N=3,159)</li> <li>• Mean age 78</li> <li>• 2,760 nondiabetics and 399 diabetics</li> </ul> | Missing data, patients treated with insulin                 | BMI, waist circumference, WHR, fasting plasmatic insulin and glucose, plasmatic lipid measurements, blood pressure measurements                                                                           | <ul style="list-style-type: none"> <li>• Principal components</li> <li>• Varimax (orthogonal) rotation</li> <li>• Factor loading threshold 0.40</li> <li>• Components with eigenvalues greater than 1 were included</li> </ul> | <ol style="list-style-type: none"> <li>1. Fat distribution (Body weight, waist circumference,)</li> <li>2. Blood Pressure (Systolic and diastolic Blood Pressure)</li> <li>3. Lipid (High Triglycerides, low HDL-Cholesterol, fasting glucose)</li> <li>4. Insulin/Glucose (fasting glucose and insulin)</li> </ol> <p>[75%]</p>      |

| <b>Study (reference #)</b> | <b>Design, Location, Population</b>                                                                                                                                                                                                        | <b>Exclusion criteria</b>             | <b>Variables studied</b>                                                                                                                                   | <b>Factor analysis methods</b>                                                                                                                                                                                                                            | <b>Factors (components) [cumulative variance explained]</b>                                                                                                                                                                                                                                                                                                  |
|----------------------------|--------------------------------------------------------------------------------------------------------------------------------------------------------------------------------------------------------------------------------------------|---------------------------------------|------------------------------------------------------------------------------------------------------------------------------------------------------------|-----------------------------------------------------------------------------------------------------------------------------------------------------------------------------------------------------------------------------------------------------------|--------------------------------------------------------------------------------------------------------------------------------------------------------------------------------------------------------------------------------------------------------------------------------------------------------------------------------------------------------------|
| Meigs et al (3)            | <ul style="list-style-type: none"> <li>• Cross-sectional</li> <li>• Framingham (USA)</li> <li>• Children and spouses of subjects of the original Framingham cohort (N=1,150 men, 1,308 women)</li> <li>• Mean age 54</li> </ul>            | Missing data, patients with diabetes. | BMI, waist circumference, WHR, fasting and post glucose challenge plasmatic glucose and insulin, plasmatic lipid measurements, blood pressure measurements | <ul style="list-style-type: none"> <li>• Principal components</li> <li>• Varimax (orthogonal) rotation</li> <li>• Factor loading threshold 0.40</li> <li>• Components with eigenvalues greater than 1 were included</li> <li>• Analysis by sex</li> </ul> | <ol style="list-style-type: none"> <li>1. central metabolic syndrome (BMI, waist-to-hip ratio, high Triglycerides, low HDL-Cholesterol, fasting and post challenge insulin)</li> <li>2. Impaired glucose tolerance (fasting and post challenge glucose and insulin)</li> <li>3. Blood Pressure (BMI, Systolic and diastolic Blood Pressure)</li> </ol> [64%] |
| Donahue et al (4)          | <ul style="list-style-type: none"> <li>• Cohort</li> <li>• Miami (USA)</li> <li>• Subset of 50 consecutive patients (African American and non-hispanic whites) at baseline</li> <li>• Mean age 35.3 SD: 5.9</li> <li>• 52% male</li> </ul> | Missing data, patients with diabetes  | Uric acid, lipid measurements, blood pressure, BMI, waist circumference, hyperinsulinemia euglycemic clamp                                                 | <ul style="list-style-type: none"> <li>• Principal components</li> <li>• Varimax (orthogonal) rotation</li> <li>• Factor loading threshold 0.40</li> <li>• Components with eigenvalues greater than 1 were included</li> </ul>                            | <ol style="list-style-type: none"> <li>1. Factor 1 (uric acid, systolic and diastolic blood pressure, high triglycerides, low HDL-Cholesterol, waist circumference, low insulin sensitivity)</li> <li>2. Factor 2 (fasting insulin, fasting glucose, diastolic blood pressure, low insulin sensitivity)</li> </ol> [55%]                                     |

| <b>Study (reference #)</b> | <b>Design, Location, Population</b>                                                                                                                                     | <b>Exclusion criteria</b>                   | <b>Variables studied</b>                                                                                                                                                                                                                                                                              | <b>Factor analysis methods</b>                                                                                                                                                                                                                                                                                                                                   | <b>Factors (components) [cumulative variance explained]</b>                                                                                                                                                                                                                                                                                                                                                                                                                                  |
|----------------------------|-------------------------------------------------------------------------------------------------------------------------------------------------------------------------|---------------------------------------------|-------------------------------------------------------------------------------------------------------------------------------------------------------------------------------------------------------------------------------------------------------------------------------------------------------|------------------------------------------------------------------------------------------------------------------------------------------------------------------------------------------------------------------------------------------------------------------------------------------------------------------------------------------------------------------|----------------------------------------------------------------------------------------------------------------------------------------------------------------------------------------------------------------------------------------------------------------------------------------------------------------------------------------------------------------------------------------------------------------------------------------------------------------------------------------------|
| Leyva et al (5)            | <ul style="list-style-type: none"> <li>Cohort (baseline data analysis, 1971)</li> <li>London (England)</li> <li>742 White males</li> <li>Age range 26-71</li> </ul>     | Patients with diabetes or CHD               | BMI, waist circumference, WHR, fasting and post glucose challenge plasmatic glucose and insulin, plasmatic lipid measurements, mean arterial pressure, hemoglobin concentration; white cell count, erythrocyte sedimentation rate, uric acid, albumin, globulin, incremental glucose and insulin area | <p>Data were adjusted to the mean age of the cohort using the univariate regression coefficient</p> <ul style="list-style-type: none"> <li>Imputation of missing values</li> <li>Principal components</li> <li>Varimax (orthogonal) rotation</li> <li>Components with eigenvalues greater than 1 were included</li> <li>Factor loading threshold 0.25</li> </ul> | <ol style="list-style-type: none"> <li>Factor 1 (incremental glucose area, incremental insulin area, fasting insulin, BMI, uric acid, triglycerides)</li> <li>Factor 2 (globulin, albumin, white cell count, hemoglobin, potassium)</li> <li>Factor 3 (high triglycerides, low HDL-Cholesterol)</li> <li>Factor 4 (mean arterial pressure, fasting glucose, sodium, potassium, albumin)</li> <li>Factor 5 (hemoglobin concentration, erythrocyte sedimentation rate)</li> </ol> <p>[14%]</p> |
| Leyva et al (6)            | <ul style="list-style-type: none"> <li>Cohort (only baseline data analysis, 1988)</li> <li>London (England)</li> <li>74 males</li> <li>Mean age 48.4 SD: 1.3</li> </ul> | Patients with diabetes, CHD or hypertension | BMI, skinfold thickness ratio, insulin sensitivity, fasting and post glucose challenge plasmatic insulin and glucose, plasmatic lipid measurements, systolic and diastolic blood pressure, uric acid                                                                                                  | <ul style="list-style-type: none"> <li>Principal components</li> <li>Varimax (orthogonal) rotation</li> <li>Factor loading threshold 0.40</li> </ul>                                                                                                                                                                                                             | <ol style="list-style-type: none"> <li>Metabolic cluster (insulin sensitivity, leptin, post challenge insulin, fasting glucose and insulin, BMI)</li> <li>Factor 2 (post challenge glucose, systolic blood pressure, uric acid, skinfold thickness)</li> <li>Factor 3 (High Triglycerides, low HDL-Cholesterol)</li> </ol> <p>[25%]</p>                                                                                                                                                      |

| <b>Study (reference #)</b> | <b>Design, Location, Population</b>                                                                                                                                                                                                                | <b>Exclusion criteria</b> | <b>Variables studied</b>                                                                                                                                       | <b>Factor analysis methods</b>                                                                                                                                                                                                                                                                                        | <b>Factors (components) [cumulative variance explained]</b>                                                                                                                                                                                                                                                                                                                        |
|----------------------------|----------------------------------------------------------------------------------------------------------------------------------------------------------------------------------------------------------------------------------------------------|---------------------------|----------------------------------------------------------------------------------------------------------------------------------------------------------------|-----------------------------------------------------------------------------------------------------------------------------------------------------------------------------------------------------------------------------------------------------------------------------------------------------------------------|------------------------------------------------------------------------------------------------------------------------------------------------------------------------------------------------------------------------------------------------------------------------------------------------------------------------------------------------------------------------------------|
| Gray et al (7)             | <ul style="list-style-type: none"> <li>• Cohort (only baseline data analysis, 1988)</li> <li>• Samples from Arizona, Oklahoma, North and South Dakota (USA)</li> <li>• American Indians (975 men and 1202 women)</li> <li>• Mean age 55</li> </ul> | Diabetic subjects         | BMI, waist and hip circumferences, fasting glucose and insulin, plasmatic lipid measurements, systolic and diastolic blood pressure, ECG, ankle brachial index | <ul style="list-style-type: none"> <li>• Principal component analysis</li> <li>• Varimax (orthogonal) rotation</li> <li>• Components with eigenvalues greater than 1 were included (in one case greater than 0.9)</li> <li>• Factor loading threshold 0.40</li> <li>• Analyses performed separately by sex</li> </ul> | <ol style="list-style-type: none"> <li>1. Glucose/obesity factor (BMI, glucose, insulin)</li> <li>2. Blood pressure factor (systolic and diastolic blood pressure)</li> <li>3. Dyslipidemia factor (Triglycerides, low HDL-Cholesterol, insulin, but insulin not included for females)</li> </ol> <p>Factor 1 and Factor 2 (only in males) associated with prevalent CHD [70%]</p> |

| <b>Study (reference #)</b> | <b>Design, Location, Population</b>                                                                                                                 | <b>Exclusion criteria</b> | <b>Variables studied</b>                                                                                                                                                                                                                                                                    | <b>Factor analysis methods</b>                                                                                                                                                                                                               | <b>Factors (components) [cumulative variance explained]</b>                                                                                                                                                                                                                                                                                                                                                                                                                                                                                                                                                                                                                                                                                                                                                                                                                                                                                                                                                                                             |
|----------------------------|-----------------------------------------------------------------------------------------------------------------------------------------------------|---------------------------|---------------------------------------------------------------------------------------------------------------------------------------------------------------------------------------------------------------------------------------------------------------------------------------------|----------------------------------------------------------------------------------------------------------------------------------------------------------------------------------------------------------------------------------------------|---------------------------------------------------------------------------------------------------------------------------------------------------------------------------------------------------------------------------------------------------------------------------------------------------------------------------------------------------------------------------------------------------------------------------------------------------------------------------------------------------------------------------------------------------------------------------------------------------------------------------------------------------------------------------------------------------------------------------------------------------------------------------------------------------------------------------------------------------------------------------------------------------------------------------------------------------------------------------------------------------------------------------------------------------------|
| Lempiainen et al (8)       | <ul style="list-style-type: none"> <li>Cohort, 7 years of follow-up</li> <li>Kuopio (Finland)</li> <li>Caucasian (396 men and 673 women)</li> </ul> | Diabetes                  | BMI, waist and hip circumferences, fasting and post oral glucose challenge plasmatic glucose and insulin, plasmatic lipid measurements, systolic and diastolic blood pressure, alcohol consumption, smoking status, left ventricular hypertrophy, albumin/creatinine ratio, presence of CHD | <ul style="list-style-type: none"> <li>Principal component analysis</li> <li>Varimax (orthogonal) rotation</li> <li>Factor loading threshold 0.40</li> <li>Eigenvalues not Mentioned</li> <li>Separate analyses for men and women</li> </ul> | <p>Men</p> <ol style="list-style-type: none"> <li>Factor 1 (BMI, waist-to-hip ratio, fasting glucose and fasting insulin, Triglycerides, low HDL-Cholesterol)</li> <li>Factor 2 (alcohol consumption, total cholesterol, triglycerides, low HDL-cholesterol, fasting insulin)</li> <li>Factor 3 (age, left ventricular hypertrophy, systolic blood pressure, albumin/creatinine ratio)</li> <li>Factor 4 (previous stroke, Apolipoprotein e4 allele, total cholesterol, triglycerides)</li> </ol> <p>Women</p> <ol style="list-style-type: none"> <li>Factor 1 (BMI, waist-to-hip ratio, fasting glucose and fasting insulin, Triglycerides, low HDL-Cholesterol)</li> <li>Factor 2 (previous stroke, Triglycerides, low HDL-Cholesterol, total cholesterol)</li> <li>Factor 3 (age, left ventricular hypertrophy, systolic blood pressure, albumin/creatinine ratio, cholesterol)</li> <li>Factor 4 (smoking, alcohol consumption, total cholesterol)</li> </ol> <p>All factors predicted CHD in men, only factors 2 and 3 predicted CHD in women.</p> |

| <b>Study (reference #)</b> | <b>Design, Location, Population</b>                                                                                                                                                                                                                                                   | <b>Exclusion criteria</b>              | <b>Variables studied</b>                                                                                                              | <b>Factor analysis methods</b>                                                                                                                                                                                                                                                                 | <b>Factors (components) [cumulative variance explained]</b>                                                                                                                                                                                                                                                                                                                                                                                                                                                                                                                                                                                                                                                                                          |
|----------------------------|---------------------------------------------------------------------------------------------------------------------------------------------------------------------------------------------------------------------------------------------------------------------------------------|----------------------------------------|---------------------------------------------------------------------------------------------------------------------------------------|------------------------------------------------------------------------------------------------------------------------------------------------------------------------------------------------------------------------------------------------------------------------------------------------|------------------------------------------------------------------------------------------------------------------------------------------------------------------------------------------------------------------------------------------------------------------------------------------------------------------------------------------------------------------------------------------------------------------------------------------------------------------------------------------------------------------------------------------------------------------------------------------------------------------------------------------------------------------------------------------------------------------------------------------------------|
| Chen et al (9)             | <ul style="list-style-type: none"> <li>• Cross-sectional,</li> <li>• Bogalussa, LA (USA)</li> <li>• Children aged 5-17 years (2,515)</li> <li>• Young adults aged 18-38 years (2,007)</li> <li>• 65% White, 35% Black</li> <li>• No data available regarding % male/female</li> </ul> | Missing values and non-fasting samples | Ponderal index, blood pressure, lipid measurements, insulin                                                                           | <ul style="list-style-type: none"> <li>• Principal component analysis</li> <li>• Varimax (orthogonal) rotation</li> <li>• Components with eigenvalues greater than 1 were included</li> <li>• Factor loading threshold 0.30</li> <li>• Analyses stratified by race and 3 age groups</li> </ul> | <ol style="list-style-type: none"> <li>1. Factor 1 (ponderal index, fasting glucose and fasting insulin, Triglycerides, low HDL-Cholesterol)</li> <li>2. Factor 2 (systolic and diastolic blood pressure, insulin) [54.6%]</li> </ol>                                                                                                                                                                                                                                                                                                                                                                                                                                                                                                                |
| Kekalainen et al (10)      | <ul style="list-style-type: none"> <li>• Cohort, 8 years of follow-up</li> <li>• Kuopio (Finland)</li> <li>• 309 siblings of diabetic (DM+) or nondiabetic (DM-) probands.</li> <li>• 184 sisters and 125 brothers</li> </ul>                                                         | Diabetes                               | Medical history, BMI, blood pressure, oral glucose tolerance test, lipids, uric acid, urine proteins, 1 and 2 h postchallenge insulin | <ul style="list-style-type: none"> <li>• Principal component analysis</li> <li>• Quatrimax rotation</li> <li>• Components with eigenvalues greater than 1 were included</li> <li>• Factor loading threshold 0.40</li> </ul>                                                                    | <p>Siblings in DM+ group</p> <ol style="list-style-type: none"> <li>1. Factor 1 (age, BMI, hypertension, glucose and insulin area, high Triglycerides and low HDL-Cholesterol)</li> <li>2. Factor 2 (sex, HDL-cholesterol)</li> <li>3. Factor 3 (total cholesterol, triglycerides)</li> <li>4. Factor 4 (age, urinary protein) [66.4%]</li> </ol> <p>Siblings in DM- group</p> <ol style="list-style-type: none"> <li>1. Factor 1 (age, BMI, hypertension, glucose and insulin area, high Triglycerides)</li> <li>2. Factor 2 (sex, HDL-cholesterol)</li> <li>3. Factor 3 (total cholesterol, triglycerides)</li> <li>4. Factor 4 (urinary protein) [62.5%]</li> </ol> <p>Factor 1 predicted the development of diabetes at 8 years of follow-up</p> |

| <b>Study (reference #)</b> | <b>Design, Location, Population</b>                                                                                                                                                                                          | <b>Exclusion criteria</b>         | <b>Variables studied</b>                                                                                                                                                                                                                                                                                                          | <b>Factor analysis methods</b>                                                                                                                                                                                                                                           | <b>Factors (components) [cumulative variance explained]</b>                                                                                                                                                                                                                                                                                                                                                                                                                                                                                                |
|----------------------------|------------------------------------------------------------------------------------------------------------------------------------------------------------------------------------------------------------------------------|-----------------------------------|-----------------------------------------------------------------------------------------------------------------------------------------------------------------------------------------------------------------------------------------------------------------------------------------------------------------------------------|--------------------------------------------------------------------------------------------------------------------------------------------------------------------------------------------------------------------------------------------------------------------------|------------------------------------------------------------------------------------------------------------------------------------------------------------------------------------------------------------------------------------------------------------------------------------------------------------------------------------------------------------------------------------------------------------------------------------------------------------------------------------------------------------------------------------------------------------|
| Pyorala et al (11)         | <ul style="list-style-type: none"> <li>• Cohort, 22 years of follow-up</li> <li>• Helsinki (Finland)</li> <li>• 970 Caucasian men</li> <li>• Median age 48</li> </ul>                                                        | Cardiovascular diseases, diabetes | BMI, subscapular and triceps skinfold thicknesses, fasting and post oral glucose challenge glucose and insulin, area under the curve (AUC), plasmatic lipid measurements, systolic and diastolic blood pressure, physical activity, predicted maximal O <sub>2</sub> uptake, smoking status, incidence of cardiovascular diseases | <ul style="list-style-type: none"> <li>• Principal component analysis</li> <li>• Varimax (orthogonal) rotation</li> <li>• Components with eigenvalues greater than 1 were included</li> <li>• Factor loading threshold 0.40 (noted if <math>\geq 0.30</math>)</li> </ul> | <ol style="list-style-type: none"> <li>1. Insulin resistance (BMI, subscapular skinfold, AUC insulin, maximal O<sub>2</sub> uptake, AUC glucose, mean blood pressure, and triglycerides)</li> <li>2. Lipid factor (cholesterol and triglycerides)</li> <li>3. Lifestyle factor (smoking and physical activity)</li> </ol> <p>[54%]</p> <p>Factors 1 and 2 increased risk of CHD. Factor 1 increased risk of stroke after 15 years of follow-up</p>                                                                                                         |
| Snehalatha et al (12)      | <ul style="list-style-type: none"> <li>• Cross-sectional</li> <li>• Madras (India)</li> <li>• Adults 40 years of age or older (N=396 men, 258 women)</li> <li>• Mean (SD) age 46 (8) for men and 47(8) for women.</li> </ul> | Diabetes<br>Missing data          | BMI, WHR, fasting and post oral glucose challenge glucose and insulin, HOMA IR, plasmatic lipid measurements, systolic and diastolic blood pressure,                                                                                                                                                                              | <ul style="list-style-type: none"> <li>• Principal component analysis</li> <li>• Varimax (orthogonal) rotation</li> <li>• Components with eigenvalues greater than 1 were included</li> <li>• Factor loading threshold 0.30</li> </ul>                                   | <p>Men</p> <ol style="list-style-type: none"> <li>1. Factor 1(BMI, 2h glucose and insulin, HOMA IR)</li> <li>2. Factor 2 (BMI, systolic and diastolic blood pressure)</li> </ol> <p>Factor 3 (BMI, total cholesterol, triglycerides, WHR)</p> <p>[65%]</p> <p>Women</p> <ol style="list-style-type: none"> <li>1. Factor 1(BMI, 2h glucose and insulin, HOMA IR)</li> <li>2. Factor 2 (BMI, systolic and diastolic blood pressure)</li> <li>3. Factor 3 ( total cholesterol and triglycerides)</li> <li>4. Factor 4 (IR, BMI, WHR)</li> </ol> <p>[74%]</p> |

| <b>Study (reference #)</b> | <b>Design, Location, Population</b>                                                                                                                                                                                                                                                          | <b>Exclusion criteria</b>  | <b>Variables studied</b>                                                                                                                                                                                                                                                                        | <b>Factor analysis methods</b>                                                                                                                                                                                                 | <b>Factors (components) [cumulative variance explained]</b>                                                                                                                                                                                                                                                                                                                                                                                                                                                                        |
|----------------------------|----------------------------------------------------------------------------------------------------------------------------------------------------------------------------------------------------------------------------------------------------------------------------------------------|----------------------------|-------------------------------------------------------------------------------------------------------------------------------------------------------------------------------------------------------------------------------------------------------------------------------------------------|--------------------------------------------------------------------------------------------------------------------------------------------------------------------------------------------------------------------------------|------------------------------------------------------------------------------------------------------------------------------------------------------------------------------------------------------------------------------------------------------------------------------------------------------------------------------------------------------------------------------------------------------------------------------------------------------------------------------------------------------------------------------------|
| Sakkinen et al (13)        | <ul style="list-style-type: none"> <li>Medicare cohort, baseline data analysis only (USA)</li> <li>65 years of age or older</li> <li>1,690 women and 991 men</li> <li>Subset of 322 subjects with additional measurements was also analyzed (51% females, mean (SD) age 77 (7.4))</li> </ul> | Diabetes, warfarin therapy | <p>In the whole population:<br/>BMI, waist circumference, fasting and post oral glucose challenge plasmatic glucose and insulin, plasmatic lipid measurements, systolic and diastolic blood pressure</p> <p>In the subset:<br/>Same measurements plus hemostatic and inflammatory variables</p> | <ul style="list-style-type: none"> <li>Principal component analysis</li> <li>Varimax (orthogonal) rotation</li> <li>Components with eigenvalues greater than 1 were included</li> <li>Factor loading threshold 0.40</li> </ul> | <ol style="list-style-type: none"> <li>Body mass (weight, waist circumference, fasting insulin)</li> <li>Insulin/glucose (fasting and post challenge glucose, fasting and post challenge insulin)</li> <li>Lipids (High Triglycerides, low HDL-Cholesterol)</li> <li>Blood pressure (systolic and diastolic blood pressure)</li> </ol> <p>[70%]<br/>Subset<br/>3 additional factors (inflammation, pro-coagulation, vitamin K-dependent proteins)<br/>[66%]</p>                                                                    |
| Chen et al (14)            | <ul style="list-style-type: none"> <li>Cross-sectional,</li> <li>Kinmen (Taiwan)</li> <li>3659 men and 4778 women</li> <li>Mean (SD) age 49.2 (12.6)</li> </ul>                                                                                                                              | Diabetes, missing data     | BMI, WHR, fasting glucose and insulin, plasmatic lipid measurements, systolic and diastolic blood pressure                                                                                                                                                                                      | <ul style="list-style-type: none"> <li>Principal component analysis</li> <li>Varimax (orthogonal) rotation</li> <li>Components with eigenvalues greater than 1 were included</li> <li>Factor loading threshold 0.25</li> </ul> | <p>Men</p> <ol style="list-style-type: none"> <li>Factor 1 (systolic and diastolic blood pressure)</li> <li>Factor 2 (fasting insulin, BMI, WHR, high Triglycerides and low HDL-Cholesterol)</li> <li>Factor 3 (fasting glucose)</li> </ol> <p>[62%]<br/>Women</p> <ol style="list-style-type: none"> <li>Factor 1 (systolic and diastolic blood pressure)</li> <li>Factor 2 (fasting insulin, BMI, WHR, high Triglycerides and low HDL-Cholesterol)</li> <li>Factor 3 (fasting glucose and Triglycerides)</li> </ol> <p>[62%]</p> |

| <b>Study (reference #)</b> | <b>Design, Location, Population</b>                                                                                                                                                      | <b>Exclusion criteria</b>                                | <b>Variables studied</b>                                                                                                                                                                                                  | <b>Factor analysis methods</b>                                                                                                                                                                                                         | <b>Factors (components) [cumulative variance explained]</b>                                                                                                                                                                                                                                                                                                                                                                                                                                                                                                                                                                                                                                                                  |
|----------------------------|------------------------------------------------------------------------------------------------------------------------------------------------------------------------------------------|----------------------------------------------------------|---------------------------------------------------------------------------------------------------------------------------------------------------------------------------------------------------------------------------|----------------------------------------------------------------------------------------------------------------------------------------------------------------------------------------------------------------------------------------|------------------------------------------------------------------------------------------------------------------------------------------------------------------------------------------------------------------------------------------------------------------------------------------------------------------------------------------------------------------------------------------------------------------------------------------------------------------------------------------------------------------------------------------------------------------------------------------------------------------------------------------------------------------------------------------------------------------------------|
| Lindblad et al (15)        | <ul style="list-style-type: none"> <li>• Cross-sectional,</li> <li>• California (USA)</li> <li>• Elderly men (N = 1,015) and women (N = 1,259)</li> <li>• Median age 70 years</li> </ul> | Sensitivity analysis excluding all hypertensive subjects | BMI, waist circumference, fasting and post oral glucose challenge plasmatic glucose and insulin, plasmatic lipid measurements, systolic and diastolic blood pressure, smoking history, electrocardiographic abnormalities | <ul style="list-style-type: none"> <li>• Principal component analysis</li> <li>• Varimax (orthogonal) rotation</li> <li>• Components with eigenvalues greater than 1 were included</li> <li>• Factor loading threshold 0.40</li> </ul> | <p>Men</p> <ol style="list-style-type: none"> <li>1. Syndrome (BMI, fasting and 2h insulin, high Triglycerides and low HDL-Cholesterol)</li> <li>2. Glucose (fasting and 2h glucose)</li> <li>3. Blood pressure (systolic and diastolic blood pressure)</li> <li>4. LDL-Cholesterol (LDL- cholesterol)</li> </ol> <p>[66%]</p> <p>Women</p> <ol style="list-style-type: none"> <li>1. Syndrome (BMI, fasting and 2h insulin, high Triglycerides, LDL-cholesterol, and low HDL-Cholesterol)</li> <li>2. Glucose (fasting and 2h glucose)</li> <li>3. Blood pressure (systolic and diastolic blood pressure)</li> </ol> <p>[56%]</p> <p>The 3 factors were associated with prevalent CHD (electrocardiogram abnormalities)</p> |

| <b>Study (reference #)</b> | <b>Design, Location, Population</b>                                                                                                                                                                                      | <b>Exclusion criteria</b>                                                                              | <b>Variables studied</b>                                                                                                                                                                                         | <b>Factor analysis methods</b>                                                                                                                                                                                                         | <b>Factors (components) [cumulative variance explained]</b>                                                                                                                                                                                                                                                                                                                                                                                                                                                                                                                                                                                                                          |
|----------------------------|--------------------------------------------------------------------------------------------------------------------------------------------------------------------------------------------------------------------------|--------------------------------------------------------------------------------------------------------|------------------------------------------------------------------------------------------------------------------------------------------------------------------------------------------------------------------|----------------------------------------------------------------------------------------------------------------------------------------------------------------------------------------------------------------------------------------|--------------------------------------------------------------------------------------------------------------------------------------------------------------------------------------------------------------------------------------------------------------------------------------------------------------------------------------------------------------------------------------------------------------------------------------------------------------------------------------------------------------------------------------------------------------------------------------------------------------------------------------------------------------------------------------|
| Hodge et al (16)           | <ul style="list-style-type: none"> <li>• Cross-sectional</li> <li>• Mauritius Island</li> <li>• Adults (25-74 years of age)</li> <li>• 1414 men with mean (SD) age 41 (0.3); and 1654 women with age 42 (0.3)</li> </ul> | Diabetes                                                                                               | BMI, WHR, waist circumference, fasting and post oral glucose challenge glucose and insulin, leptin, plasmatic lipid measurements, uric acid, blood pressure, smoking history, electrocardiographic abnormalities | <ul style="list-style-type: none"> <li>• Principal component analysis</li> <li>• Varimax (orthogonal) rotation</li> <li>• Components with eigenvalues greater than 1 were included</li> <li>• Factor loading threshold 0.40</li> </ul> | <p>Men</p> <ol style="list-style-type: none"> <li>1. Factor 1 (BMI, WHR, leptin, fasting and 2h insulin, high triglycerides and low HDL-Cholesterol)</li> <li>2. Factor 2 (systolic and diastolic blood pressure, uric acid)</li> <li>3. Factor 3 (fasting and 2h insulin, fasting and 2 h glucose)</li> </ol> <p>[55%]</p> <p>4.</p> <p>Women</p> <ol style="list-style-type: none"> <li>1. Factor 1 (BMI, WHR, leptin, fasting and 2h insulin, high triglycerides and low HDL-Cholesterol, uric acid)</li> <li>2. Factor 2 (systolic and diastolic blood pressure, fasting glucose)</li> <li>3. Factor 3 (fasting and 2h insulin, fasting and 2 h glucose)</li> </ol> <p>[54%]</p> |
| Shmulewitz et al (17)      | <ul style="list-style-type: none"> <li>• Cross-sectional</li> <li>• Kosrae (Micronesia)</li> <li>• 2,188 participants (90% of the whole population)</li> <li>• Age 20-85, mean (SD) age 42 (14)</li> </ul>               | <p>Missing data, diabetes</p> <p>Factor analysis of 255 males and 373 females without missing data</p> | BMI, WHR, waist circumference, fasting plasmatic glucose and insulin, plasmatic leptin and lipid measurements, apolipoproteins, blood pressure, smoking history (only in males)                                  | <ul style="list-style-type: none"> <li>• Principal component analysis</li> <li>• Varimax (orthogonal) rotation</li> <li>• Factor loading threshold 0.40</li> </ul>                                                                     | <ol style="list-style-type: none"> <li>1. Factor 1 (weight, waist, fasting insulin, leptin)</li> <li>2. Factor 2 (total cholesterol, triglycerides, apo B, apo A-1)</li> <li>3. Factor 3 (fasting glucose, systolic and diastolic blood pressure)</li> <li>4. Factor 4 (leptin, triglycerides, apo A-1)</li> </ol> <p>[73.1%]</p>                                                                                                                                                                                                                                                                                                                                                    |

| <b>Study (reference #)</b> | <b>Design, Location, Population</b>                                                                                                                                             | <b>Exclusion criteria</b> | <b>Variables studied</b>                                                                                                                                                                               | <b>Factor analysis methods</b>                                                                                                                                                                                                 | <b>Factors (components) [cumulative variance explained]</b>                                                                                                                                                                                                                                                                                                                                                                                                                                                                                                                                                          |
|----------------------------|---------------------------------------------------------------------------------------------------------------------------------------------------------------------------------|---------------------------|--------------------------------------------------------------------------------------------------------------------------------------------------------------------------------------------------------|--------------------------------------------------------------------------------------------------------------------------------------------------------------------------------------------------------------------------------|----------------------------------------------------------------------------------------------------------------------------------------------------------------------------------------------------------------------------------------------------------------------------------------------------------------------------------------------------------------------------------------------------------------------------------------------------------------------------------------------------------------------------------------------------------------------------------------------------------------------|
| Lakka et al (18)           | <ul style="list-style-type: none"> <li>Population-based cohort, 14 years of follow-up</li> <li>Kuopio (Finland)</li> <li>1,209 men</li> <li>Mean (SD) Age 51.9 (5.9)</li> </ul> | CVD, diabetes, and cancer | BMI, waist circumference, WHR, fibrinogen, white blood cells, fasting plasmatic glucose and insulin, plasmatic lipid measurements, systolic and diastolic blood pressure, smoking and alcohol history, | <ul style="list-style-type: none"> <li>Principal component analysis</li> <li>Varimax (orthogonal) rotation</li> <li>Components with eigenvalues greater than 1 were included</li> <li>Factor loading threshold 0.30</li> </ul> | <ol style="list-style-type: none"> <li>Metabolic Syndrome (BMI, WHR, fasting insulin and glucose, systolic blood pressure, high Triglycerides and low HDL-Cholesterol)</li> <li>Factor 2 (smoking, fibrinogen, white blood cells)</li> <li>Factor 3 (fasting glucose, alcohol, systolic blood pressure, low triglycerides and LDL-cholesterol, and high HDL-Cholesterol)</li> <li>Factor 4 (LDL- cholesterol, ischemic heart disease in family)</li> </ol> <p>[53%]<br/>The metabolic syndrome significantly increased (RRs between 3.77 and 2.43) the risk of coronary, cardiovascular, and all-cause mortality</p> |

| <b>Study (reference #)</b> | <b>Design, Location, Population</b>                                                                                                                                                                                                                                                                                                                                                                                               | <b>Exclusion criteria</b>    | <b>Variables studied</b>                                                                                                                                                                                                       | <b>Factor analysis methods</b>                                                                                                                                                                                                         | <b>Factors (components) [cumulative variance explained]</b>                                                                                                                                                                                                                                                                                                                                                                                                                                                                                              |
|----------------------------|-----------------------------------------------------------------------------------------------------------------------------------------------------------------------------------------------------------------------------------------------------------------------------------------------------------------------------------------------------------------------------------------------------------------------------------|------------------------------|--------------------------------------------------------------------------------------------------------------------------------------------------------------------------------------------------------------------------------|----------------------------------------------------------------------------------------------------------------------------------------------------------------------------------------------------------------------------------------|----------------------------------------------------------------------------------------------------------------------------------------------------------------------------------------------------------------------------------------------------------------------------------------------------------------------------------------------------------------------------------------------------------------------------------------------------------------------------------------------------------------------------------------------------------|
| Hanson et al (19)          | <ul style="list-style-type: none"> <li>• Cohort</li> <li>• Gila River Indian Community (Arizona)</li> <li>• Community residents who were 20 years of age or older</li> <li>• 1,448 nondiabetic individuals (856 women and 592 men) with mean (SD) age 34.6 (11.7)</li> <li>• 470 diabetic individuals (303 women and 167 men) with mean (SD) age 43.5 (12.8)</li> <li>• For final analysis, both groups were combined.</li> </ul> | Pregnancy, insulin treatment | Fasting and 2-h plasma glucose concentrations, fasting and 2-h serum insulin concentrations, systolic and diastolic blood pressure, body weight, waist circumference, serum triglycerides, and HDL cholesterol concentrations. | <ul style="list-style-type: none"> <li>• Principal component analysis</li> <li>• Varimax (orthogonal) rotation</li> <li>• Components with eigenvalues greater than 1 were included</li> <li>• Factor loading threshold 0.40</li> </ul> | <ol style="list-style-type: none"> <li>1. Insulinemia (fasting insulin*glucose, 2h insulin*glucose, fasting insulin/glucose, 2h insulin/glucose)</li> <li>2. Body size (body weight, waist circumference, fasting insulin*glucose)</li> <li>3. Blood pressure (systolic and diastolic blood pressure)</li> <li>4. Lipidemia (high Triglycerides and low HDL-Cholesterol) [79%]</li> </ol> <p>Insulinemia, body size, and lipidemia significantly increased the risk of type 2 diabetes. (Incidence rate ratios of 1.81, 1.52, and 1.37 respectively)</p> |

| <b>Study (reference #)</b> | <b>Design, Location, Population</b>                                                                                                                                                                                                                | <b>Exclusion criteria</b> | <b>Variables studied</b>                                                                                                                                                                            | <b>Factor analysis methods</b>                                                                                                                                                                                                                                                                                                                                     | <b>Factors (components) [cumulative variance explained]</b>                                                                                                                                                                                                                                                                                            |
|----------------------------|----------------------------------------------------------------------------------------------------------------------------------------------------------------------------------------------------------------------------------------------------|---------------------------|-----------------------------------------------------------------------------------------------------------------------------------------------------------------------------------------------------|--------------------------------------------------------------------------------------------------------------------------------------------------------------------------------------------------------------------------------------------------------------------------------------------------------------------------------------------------------------------|--------------------------------------------------------------------------------------------------------------------------------------------------------------------------------------------------------------------------------------------------------------------------------------------------------------------------------------------------------|
| Hanley et al (20)          | <ul style="list-style-type: none"> <li>• Multicenter cohort (2 centers in California and 2 in Texas (USA))</li> <li>• Analysis of baseline data</li> <li>• 1087 nondiabetic subjects (56,4% female)</li> <li>• Mean (SD) age 54.8 (8.4)</li> </ul> | Diabetes, missing data    | Glucose tolerance test, insulin sensitivity, HOMA-IR, systolic and diastolic blood pressure, BMI, waist circumference, plasma lipid and lipoproteins concentrations, urinary albumin and creatinine | <ul style="list-style-type: none"> <li>• Principal component analysis</li> <li>• Varimax (orthogonal) rotation</li> <li>• Scree plots and eigenvalues (0.9) were used to select components to be retained. included</li> <li>• Factor loading threshold 0.40</li> <li>• Analyses performed overall and by sex, glucose tolerance status, and ethnicity.</li> </ul> | <ol style="list-style-type: none"> <li>1. Metabolic factor (BMI, waist, fasting glucose, 2 h glucose, insulin sensitivity-or HOMA IR-, high triglycerides and low HDL-Cholesterol)</li> <li>2. Blood pressure (Systolic and diastolic blood pressure)</li> </ol> <p>Men [37.7%]<br/>Women [38.9%]</p> <p>Analyses by subgroups had similar results</p> |

| <b>Study (reference #)</b> | <b>Design, Location, Population</b>                                                                                                                                                                                                                                                                                                                                                                                                                   | <b>Exclusion criteria</b>                                                                                   | <b>Variables studied</b>                                                                                                                                                                                                          | <b>Factor analysis methods</b>                                                                                                                                                                                                         | <b>Factors (components) [cumulative variance explained]</b>                                                                                                                                                                                                                                                                                                                                                                                                                                                                                                                                                                                       |
|----------------------------|-------------------------------------------------------------------------------------------------------------------------------------------------------------------------------------------------------------------------------------------------------------------------------------------------------------------------------------------------------------------------------------------------------------------------------------------------------|-------------------------------------------------------------------------------------------------------------|-----------------------------------------------------------------------------------------------------------------------------------------------------------------------------------------------------------------------------------|----------------------------------------------------------------------------------------------------------------------------------------------------------------------------------------------------------------------------------------|---------------------------------------------------------------------------------------------------------------------------------------------------------------------------------------------------------------------------------------------------------------------------------------------------------------------------------------------------------------------------------------------------------------------------------------------------------------------------------------------------------------------------------------------------------------------------------------------------------------------------------------------------|
| Choi et al (21)            | <ul style="list-style-type: none"> <li>• Cross-sectional</li> <li>• Seoul (South Korea)</li> <li>• 1314 subjects over the age of 60 years (249 men and 1065 women)</li> <li>• Mean (SD) age 71.3 (6.0) for men and 70.2 (5.8) for women</li> </ul>                                                                                                                                                                                                    | Diabetes, missing data                                                                                      | Fasting and 2-h plasma glucose, fasting and 2-h serum insulin, HOMA IR, BMI, systolic and diastolic blood pressure, WHR, serum triglyceride, total cholesterol and HDL cholesterol                                                | <ul style="list-style-type: none"> <li>• Principal component analysis</li> <li>• Varimax (orthogonal) rotation</li> <li>• Components with eigenvalues greater than 1 were included</li> <li>• Factor loading threshold 0.30</li> </ul> | <p>Men</p> <ol style="list-style-type: none"> <li>1. Factor 1 (BMI, WHR, high triglycerides and low HDL-cholesterol, fasting and 2h insulin)</li> <li>2. Factor 2 (systolic and diastolic blood pressure)</li> <li>3. Factor 3 (2h insulin and glucose)</li> <li>4. Factor 4 (fasting insulin and glucose) [68%]</li> </ol> <p>Women</p> <ol style="list-style-type: none"> <li>1. Factor 1 (systolic and diastolic blood pressure)</li> <li>2. Factor 2 (high triglycerides and low HDL-cholesterol)</li> <li>3. Factor 3 (2h insulin and fasting glucose)</li> <li>4. Factor 4 (BMI, WHR, fasting insulin and fasting glucose) [65%]</li> </ol> |
| Howard et al (22)          | <ul style="list-style-type: none"> <li>• Cohort (Women's Health Initiative).</li> <li>• Participants enrolled in one or 2 clinical trials.</li> <li>• Six percent were sampled from the baseline participants (aged 50 to 79).</li> <li>• 1,635 white women, 802 Black women, 390 Hispanic women, and 256 Asian/Pacific Islander women (total 3,083)</li> <li>• 40 clinical centers throughout the US.</li> <li>• Mean (SD) age 63.1 (6.9)</li> </ul> | Exclusion criteria for the clinical trial plus diabetes, treatment with insulin or oral hypoglycemic agents | BMI, waist and hip circumference, blood pressure, medical and reproductive history, life-style habits, electrocardiograms, cardiovascular history, fasting glucose, lipids, insulin, HOMA IR, factor VII activity, and fibrinogen | <ul style="list-style-type: none"> <li>• Principal component analysis</li> <li>• Varimax (orthogonal) rotation</li> <li>• Components with eigenvalues greater than 1 were included</li> <li>• Factor loading threshold 0.30</li> </ul> | <p>Age adjusted factors in White women</p> <ol style="list-style-type: none"> <li>1. Obesity (BMI, hip, waist, HOMA IR, glucose)</li> <li>2. Dyslipidemia (HOMA IR, insulin, high triglycerides, HDL distribution, and low HDL-cholesterol)</li> <li>3. LDL (total cholesterol and LDL)</li> <li>4. Blood pressure (systolic and diastolic blood pressure) [84.2%]</li> </ol> <p>Factors 1, 2, and 4 were associated with the prevalence of CVD and CHD</p>                                                                                                                                                                                       |

| <b>Study (reference #)</b> | <b>Design, Location, Population</b>                                                                                                                                          | <b>Exclusion criteria</b>                                                                       | <b>Variables studied</b>                                                                                                                                                                                                                                                                          | <b>Factor analysis methods</b>                                                                                                                                     | <b>Factors (components) [cumulative variance explained]</b>                                                                                                                                                                                                                                                                                                                                                                                                                                                                             |
|----------------------------|------------------------------------------------------------------------------------------------------------------------------------------------------------------------------|-------------------------------------------------------------------------------------------------|---------------------------------------------------------------------------------------------------------------------------------------------------------------------------------------------------------------------------------------------------------------------------------------------------|--------------------------------------------------------------------------------------------------------------------------------------------------------------------|-----------------------------------------------------------------------------------------------------------------------------------------------------------------------------------------------------------------------------------------------------------------------------------------------------------------------------------------------------------------------------------------------------------------------------------------------------------------------------------------------------------------------------------------|
| Zitzmann et al (23)        | <ul style="list-style-type: none"> <li>• Cross-Sectional</li> <li>• 106 male volunteers</li> <li>• Munster (Germany)</li> <li>• Age 20 to 50 years old, median 28</li> </ul> | Androgen use, diabetes, dyslipidemia, hypertension, atherosclerosis, drug abuse, any medication | BMI, blood pressure, medical and reproductive history, smoking and alcohol use, physical activity, body fat content by bioimpedence measurements, hormones and lipids, leptin, insulin and C-peptide, CAG repeats, fasting glucose, lipids, insulin, HOMA IR, factor VII activity, and fibrinogen | <ul style="list-style-type: none"> <li>• Principal component analysis</li> <li>• Varimax (orthogonal) rotation</li> <li>• Factor loading threshold 0.35</li> </ul> | <ol style="list-style-type: none"> <li>1. Body composition (Fat content, CAGr, insulin, leptin, physical activity)</li> <li>2. Lipid profile (CAGr, LDL, cigarettes consumption, high triglycerides and low HDL-cholesterol)</li> <li>3. Blood pressure (systolic and diastolic blood pressure)</li> <li>4. Lifestyle/age (age, physical activity, LDL, cigarettes consumption, alcohol)</li> <li>5. Sexual hormones (estradiol, testosterone, sex hormone binding globulin levels)</li> </ol> <p>Cumulative variance not reported.</p> |

| <b>Study (reference #)</b> | <b>Design, Location, Population</b>                                                                                                                                                                                                                                           | <b>Exclusion criteria</b> | <b>Variables studied</b>                                                                                                                                                                                                       | <b>Factor analysis methods</b>                                                                                                                                                                                                                                                                                                                                                                                                            | <b>Factors (components) [cumulative variance explained]</b>                                                                                                                                                                                                                                                                                                                |
|----------------------------|-------------------------------------------------------------------------------------------------------------------------------------------------------------------------------------------------------------------------------------------------------------------------------|---------------------------|--------------------------------------------------------------------------------------------------------------------------------------------------------------------------------------------------------------------------------|-------------------------------------------------------------------------------------------------------------------------------------------------------------------------------------------------------------------------------------------------------------------------------------------------------------------------------------------------------------------------------------------------------------------------------------------|----------------------------------------------------------------------------------------------------------------------------------------------------------------------------------------------------------------------------------------------------------------------------------------------------------------------------------------------------------------------------|
| Hanley et al (24)          | <ul style="list-style-type: none"> <li>Multicenter cohort, 2 centers in California and 2 in Texas (USA)<br/>Analysis only on data at baseline</li> <li>1087 nondiabetic subjects (56,4% female)</li> <li>Mean (SD) age 54.8 (8.4)</li> </ul> <p>Reanalysis of Hanley (66)</p> | Diabetes, missing data    | Glucose tolerance test, insulin sensitivity, HOMA-IR, systolic and diastolic blood pressure, BMI, waist circumference, plasma lipid and lipoprotein concentrations, CRP, fibrinogen, and PAI-1 urinary albumin and creatinine. | <ul style="list-style-type: none"> <li>Principal factor analysis</li> <li>Varimax (orthogonal) rotation</li> <li>Factors above the break in the curve, proportion of common variance explained (&gt; 10%), and factor interpretability criteria were used to select components to be retained.</li> <li>Factor loading threshold 0.40</li> <li>Analyses performed overall and by sex, glucose tolerance status, and ethnicity.</li> </ul> | <ol style="list-style-type: none"> <li>Metabolic factor (BMI, waist, 2 h glucose, insulin sensitivity, high triglycerides and low HDL-Cholesterol, PAI-1)</li> <li>Inflammation (BMI, waist, insulin sensitivity, Fibrinogen, CRP)</li> <li>Blood pressure (Systolic and diastolic blood pressure)</li> </ol> <p>[41.8%]<br/>Analyses by subgroups had similar results</p> |

| <b>Study (reference #)</b> | <b>Design, Location, Population</b>                                                                                                                                                                                                                                      | <b>Exclusion criteria</b>                                                                          | <b>Variables studied</b>                                                                                                                                                                   | <b>Factor analysis methods</b>                                                                                                                                                                                                                                              | <b>Factors (components) [cumulative variance explained]</b>                                                                                                                                                                                                                                                                                                                                                                                                                                                                                                                                                                                 |
|----------------------------|--------------------------------------------------------------------------------------------------------------------------------------------------------------------------------------------------------------------------------------------------------------------------|----------------------------------------------------------------------------------------------------|--------------------------------------------------------------------------------------------------------------------------------------------------------------------------------------------|-----------------------------------------------------------------------------------------------------------------------------------------------------------------------------------------------------------------------------------------------------------------------------|---------------------------------------------------------------------------------------------------------------------------------------------------------------------------------------------------------------------------------------------------------------------------------------------------------------------------------------------------------------------------------------------------------------------------------------------------------------------------------------------------------------------------------------------------------------------------------------------------------------------------------------------|
| Oh et al (25)              | <ul style="list-style-type: none"> <li>• Cross-sectional, random sampling</li> <li>• Mokdong, (South Korea)</li> <li>• 269 men and 505 women aged 30–80 years</li> <li>• 43% participation rate</li> <li>• Mean (SD) age Men: 47.7 (12.2); Women: 46.6 (12.2)</li> </ul> | 63 men and 56 women taking medication for hypertension, diabetes, or dyslipidemia                  | Fasting and 2-h plasma glucose, fasting insulin, HOMA IR, BMI, systolic and diastolic blood pressure, WHR, waist circumference, serum triglyceride, total cholesterol and HDL cholesterol. | <ul style="list-style-type: none"> <li>• Principal component analysis</li> <li>• Orthogonal (varimax) rotation</li> <li>• Factor loading threshold 0.30</li> </ul>                                                                                                          | <p>Men</p> <ol style="list-style-type: none"> <li>1. Factor 1 (BMI, waist, and fasting insulin)</li> <li>2. Factor 2 (Fasting glucose and 2h glucose, fasting insulin)</li> <li>3. Factor 3 (systolic and diastolic blood pressure)</li> <li>4. Factor 4 (high triglycerides and low HDL-cholesterol, fasting insulin)</li> </ol> <p>[64.2%]</p> <p>Women</p> <ol style="list-style-type: none"> <li>1. Factor 1 (systolic and diastolic blood pressure, BMI, waist)</li> <li>2. Factor 2 (fasting and 2h glucose)</li> <li>3. Factor 3 (BMI, waist, fasting insulin, high triglycerides and low HDL-cholesterol)</li> </ol> <p>[66.8%]</p> |
| Austin et al (26)          | <ul style="list-style-type: none"> <li>• Probands cross-sectional study</li> <li>• Washington (Seattle, USA)</li> <li>• Japanese Americans</li> <li>• N= 432, 56% Women</li> <li>• Mean (SD) age 54.2 (15.8)</li> </ul>                                                  | Type 2 diabetes, CRP > 10 mg/l, or missing glucose, insulin, blood pressure, or waist measurements | Fasting glucose, fasting insulin, BMI, systolic and diastolic blood pressure, waist circumference, serum triglyceride and HDL cholesterol, CRP, and LDL particle size                      | <ul style="list-style-type: none"> <li>• Standardized residuals (adjusted by age and sex by regression analysis) were used in the factor analysis</li> <li>• Principal components analysis</li> <li>• Varimax rotation</li> <li>• Factor loading threshold 0.40.</li> </ul> | <ol style="list-style-type: none"> <li>1. Lipids (LDL size, triglycerides, HDL-cholesterol)</li> <li>2. Bodyfat/insulin/glucose/CRP (waist, fasting insulin and glucose, CRP)</li> <li>3. Blood pressure (systolic and diastolic blood pressure)</li> </ol> <p>[64.6%]</p>                                                                                                                                                                                                                                                                                                                                                                  |

| <b>Study (reference #)</b> | <b>Design, Location, Population</b>                                                                                                                                                                                                                                                                                    | <b>Exclusion criteria</b>                                                                     | <b>Variables studied</b>                                                                                                                                                                                                                | <b>Factor analysis methods</b>                                                                                                                                                                                                                                                                                                                      | <b>Factors (components) [cumulative variance explained]</b>                                                                                                                                                                                                                                |
|----------------------------|------------------------------------------------------------------------------------------------------------------------------------------------------------------------------------------------------------------------------------------------------------------------------------------------------------------------|-----------------------------------------------------------------------------------------------|-----------------------------------------------------------------------------------------------------------------------------------------------------------------------------------------------------------------------------------------|-----------------------------------------------------------------------------------------------------------------------------------------------------------------------------------------------------------------------------------------------------------------------------------------------------------------------------------------------------|--------------------------------------------------------------------------------------------------------------------------------------------------------------------------------------------------------------------------------------------------------------------------------------------|
| Weiss et al (27)           | <ul style="list-style-type: none"> <li>• Cross-sectional</li> <li>• New Haven, CT and Cincinnati, OH (USA)</li> <li>• Comparable proportions of White, African American, and Hispanic</li> <li>• Obese and overweight children and adolescents (N=470)</li> <li>• 59% female</li> <li>• Mean age : 12 years</li> </ul> | Diabetes and the use of medication that alters blood pressure or glucose or lipid metabolism. | Blood pressure, BMI, Tanner stage of development, glucose, insulin, lipids, adiponectin (in the 328 most recently enrolled subjects), CRP, and interleukin-6 (in the 293 most recently enrolled subjects), oral glucose-tolerance test. | <ul style="list-style-type: none"> <li>• Principal-component factor analysis</li> <li>• Orthogonal rotation</li> <li>• Number of components retained was based on Scree plot analysis and Eigenvalues &gt; 1</li> <li>• Factor loadings from 0.2-0.4 indicated marginal correlations and loadings &gt; 0.4 indicated strong correlation.</li> </ul> | <ol style="list-style-type: none"> <li>1. Obesity and glucose metabolism (BMI, HOMA-IR, baseline and 2h glucose)</li> <li>2. Dyslipidemia (HOMA IR, high triglycerides and low HDL cholesterol)</li> <li>3. Blood pressure (systolic and diastolic blood pressure)</li> </ol> <p>[58%]</p> |

| <b>Study (reference #)</b> | <b>Design, Location, Population</b>                                                                                                                                                                                                                                                                                                                                                                                                             | <b>Exclusion criteria</b>                                                                    | <b>Variables studied</b>                                                                                                                | <b>Factor analysis methods</b>                                                                                                                                                                                                                                                                                                 | <b>Factors (components) [cumulative variance explained]</b>                                                                                                                                                                                                                                                                  |
|----------------------------|-------------------------------------------------------------------------------------------------------------------------------------------------------------------------------------------------------------------------------------------------------------------------------------------------------------------------------------------------------------------------------------------------------------------------------------------------|----------------------------------------------------------------------------------------------|-----------------------------------------------------------------------------------------------------------------------------------------|--------------------------------------------------------------------------------------------------------------------------------------------------------------------------------------------------------------------------------------------------------------------------------------------------------------------------------|------------------------------------------------------------------------------------------------------------------------------------------------------------------------------------------------------------------------------------------------------------------------------------------------------------------------------|
| Tang et al (28)            | <ul style="list-style-type: none"> <li>Multi-center population based family study</li> <li>Participants Recruited from the Framingham Heart Study, Utah Health Family Tree Study, and the Atherosclerosis Risk in Communities Study.</li> <li>Individuals and their families participated including individuals with family history of coronary heart disease and those without. (N= 2831)</li> <li>Mean age: Men: 51.7, Women: 52.5</li> </ul> | Individuals with any missing phenotype data. Twelve subjects with BMI, WHR, or HOMA outliers | Blood pressure, lipids, lipoproteins, BMI, WHR, fibrinolytic activities, insulin, glucose, insulin resistance, PAI-1 antigen, uric acid | <ul style="list-style-type: none"> <li>Factor loadings of <math>\geq .40</math> with 15% variance were included in a factor</li> <li>Eigenvalues <math>&gt; 1.0</math> used to determine contribution of each factor to the set of variables</li> <li>Maximum likelihood analysis used to determine factor patterns</li> </ul> | <ol style="list-style-type: none"> <li>Factor 1 (BMI, WHR, subscapular skinfold, triglycerides, HDL-cholesterol, HOMA, PAI-1, serum uric acid)</li> <li>Factor 2 (Triglycerides, LDL, total cholesterol)</li> <li>Factor 3 (BMI, subscapular skinfold)</li> <li>Factor 4 (Triglycerides, LDL cholesterol) [47.4%]</li> </ol> |

| <b>Study (reference #)</b> | <b>Design, Location, Population</b>                                                                                                                                                                   | <b>Exclusion criteria</b>                                                | <b>Variables studied</b>                                                                                                                       | <b>Factor analysis methods</b>                                                                                                                                                                                                                                                                                                                                                                                                                           | <b>Factors (components) [cumulative variance explained]</b>                                                                                                                                                                                                                                                                                                                                                                                                                                                                                                                          |
|----------------------------|-------------------------------------------------------------------------------------------------------------------------------------------------------------------------------------------------------|--------------------------------------------------------------------------|------------------------------------------------------------------------------------------------------------------------------------------------|----------------------------------------------------------------------------------------------------------------------------------------------------------------------------------------------------------------------------------------------------------------------------------------------------------------------------------------------------------------------------------------------------------------------------------------------------------|--------------------------------------------------------------------------------------------------------------------------------------------------------------------------------------------------------------------------------------------------------------------------------------------------------------------------------------------------------------------------------------------------------------------------------------------------------------------------------------------------------------------------------------------------------------------------------------|
| Ford (29)                  | <ul style="list-style-type: none"> <li>NHANES III 1988-94 participants</li> <li>3410 men, 3458 women</li> <li>Age 20-90</li> <li>Subanalysis of 4641 participants with leptin measurements</li> </ul> | 2227 participants without leptin measures were excluded from subanalysis | BMI, waist circumference, WHR, fasting glucose, fasting insulin, blood pressure, plasmatic lipids, uric acid, urinary albumin creatinine ratio | <ul style="list-style-type: none"> <li>Principal components analysis</li> <li>Factors with Eigen values <math>\geq</math> 1.0 retained</li> <li>Varimax rotation to obtain uncorrelated components</li> <li>Factors with loadings <math>\geq</math> retained in components</li> <li>Scree plots used to help select components</li> <li>2 additional models developed using only waist circumference or BMI rather than 3 measures of obesity</li> </ul> | <p>Men</p> <ol style="list-style-type: none"> <li>Factor 1 (Triglycerides, insulin, systolic blood pressure, waist circumference, uric acid, leptin)</li> <li>Factor 2 (Glucose, urinary albumin creatinine ratio)</li> <li>Factor 3 (HDL, triglycerides, Systolic blood pressure)</li> </ol> <p>[32.5%]</p> <p>Women</p> <ol style="list-style-type: none"> <li>Factor 1 (Insulin, waist circumference, uric acid, leptin)</li> <li>Factor 2 (HDL, triglycerides, glucose)</li> <li>Factor 3 (Systolic blood pressure, urinary albumin creatinine ratio)</li> </ol> <p>[33.5% ]</p> |

| <b>Study (reference #)</b>    | <b>Design, Location, Population</b>                                                                                                                                                                                | <b>Exclusion criteria</b>                                | <b>Variables studied</b>                                                                                                                                                                                                                                                                                                                                                                                                                    | <b>Factor analysis methods</b>                                                                                                                                                                                                                                                                                                                                                           | <b>Factors (components) [cumulative variance explained]</b>                                                                                                                                                                                                                                                                                                                                                                                                                                                 |
|-------------------------------|--------------------------------------------------------------------------------------------------------------------------------------------------------------------------------------------------------------------|----------------------------------------------------------|---------------------------------------------------------------------------------------------------------------------------------------------------------------------------------------------------------------------------------------------------------------------------------------------------------------------------------------------------------------------------------------------------------------------------------------------|------------------------------------------------------------------------------------------------------------------------------------------------------------------------------------------------------------------------------------------------------------------------------------------------------------------------------------------------------------------------------------------|-------------------------------------------------------------------------------------------------------------------------------------------------------------------------------------------------------------------------------------------------------------------------------------------------------------------------------------------------------------------------------------------------------------------------------------------------------------------------------------------------------------|
| <b>Salmenniemi et al (30)</b> | <ul style="list-style-type: none"> <li>• Cross-sectional</li> <li>• Kuopio (Finland)</li> <li>• 119 offspring of probands with type 2 diabetes</li> <li>• Age 25-50</li> <li>• Mean (SD) age 35.5 (6.0)</li> </ul> | Spouses of probands with abnormal glucose tolerance test | Oral and intravenous glucose tolerance test, whole body glucose uptake (WBGU), fasting and post challenge insulin, systolic and diastolic blood pressure, BMI, waist and hip circumference, intra-abdominal and subcutaneous fat measured by computerized tomography (CT), plasma adiponectin, plasma lipid and lipoprotein concentrations, CRP, fibrinogen, TNF-alpha, cytokines, CRP, levels of soluble adhesion molecules, oxygen uptake | <ul style="list-style-type: none"> <li>• Principal components analysis</li> <li>• Factors with Eigen values <math>\geq</math> 1.0 retained</li> <li>• Varimax rotation to obtain uncorrelated components</li> <li>• Factors with loadings <math>\geq</math> 0.4 retained in components</li> <li>• The factor score from the analysis was categorized into the factor tertiles</li> </ul> | <p>Model 1</p> <p>1. Factor 1 (120-min plasma glucose, fasting insulin, BMI, waist, HDL-cholesterol, triglycerides, mean BP) [46.2%]</p> <p>Model 2</p> <p>4. Factor 1 (120-min plasma glucose, BMI, HDL-cholesterol, triglycerides, mean BP, WBGU, intra-abdominal fat measured by CT) [43.3%]</p> <p>The metabolic syndrome (factor scores) was associated with hypoadiponectinemia, multiple defects in glucose and energy metabolism, CRP, and elevated levels of cytokines and adhesion molecules.</p> |

## Reference List

1. Edwards KL, Austin MA, Newman B, Mayer E, Krauss RM, Selby JV: Multivariate analysis of the insulin resistance syndrome in women. *Arterioscler Thromb* 14:1940-5, 1994
2. Edwards KL, Burchfiel CM, Sharp DS, Curb JD, Rodriguez BL, Fujimoto WY, LaCroix AZ, Vitiello MV, Austin MA: Factors of the insulin resistance syndrome in nondiabetic and diabetic elderly Japanese-American men. *Am J Epidemiol* 147:441-7, 1998
3. Meigs JB, D'Agostino RB, Wilson PW, Cupples LA, Nathan DM, Singer DE: Risk variable clustering in the insulin resistance syndrome. The Framingham Offspring Study. *Diabetes* 46:1594-600, 1997
4. Donahue RP, Bean JA, Donahue RD, Goldberg RB, Prineas RJ: Does insulin resistance unite the separate components of the insulin resistance syndrome? Evidence from the Miami Community Health Study. *Arterioscler Thromb Vasc Biol* 17:2413-7, 1997
5. Leyva F, Godsland IF, Worthington M, Walton C, Stevenson JC: Factors of the metabolic syndrome: baseline interrelationships in the first follow-up cohort of the HDDRISC Study (HDDRISC-1). Heart Disease and Diabetes Risk Indicators in a Screened Cohort. *Arterioscler Thromb Vasc Biol* 18:208-14, 1998
6. Leyva F, Godsland IF, Ghatei M, Proudler AJ, Aldis S, Walton C, Bloom S, Stevenson JC: Hyperleptinemia as a component of a metabolic syndrome of cardiovascular risk. *Arterioscler Thromb Vasc Biol* 18:928-33, 1998
7. Gray RS, Fabsitz RR, Cowan LD, Lee ET, Howard BV, Savage PJ: Risk factor clustering in the insulin resistance syndrome. The Strong Heart Study. *Am J Epidemiol* 148:869-78, 1998
8. Lempiainen P, Mykkanen L, Pyorala K, Laakso M, Kuusisto J: Insulin resistance syndrome predicts coronary heart disease events in elderly nondiabetic men. *Circulation* 100:123-8, 1999
9. Chen W, Srinivasan SR, Elkasabany A, Berenson GS: Cardiovascular risk factors clustering features of insulin resistance syndrome (Syndrome X) in a biracial (Black-White) population of children, adolescents, and young adults: the Bogalusa Heart Study. *Am J Epidemiol* 150:667-74, 1999
10. Kekalainen P, Sarlund H, Pyorala K, Laakso M: Hyperinsulinemia cluster predicts the development of type 2 diabetes independently of family history of diabetes. *Diabetes Care* 22:86-92, 1999

11. Pyorala M, Miettinen H, Halonen P, Laakso M, Pyorala K: Insulin resistance syndrome predicts the risk of coronary heart disease and stroke in healthy middle-aged men: the 22-year follow-up results of the Helsinki Policemen Study. *Arterioscler Thromb Vasc Biol* 20:538-44, 2000
12. Snehalatha C, Sivasankari S, Satyavani K, Vijay V, Ramachandran A: Insulin resistance alone does not explain the clustering of cardiovascular risk factors in southern India. *Diabet Med* 17:152-7, 2000
13. Sakkinen PA, Wahl P, Cushman M, Lewis MR, Tracy RP: Clustering of procoagulation, inflammation, and fibrinolysis variables with metabolic factors in insulin resistance syndrome. *Am J Epidemiol* 152:897-907, 2000
14. Chen CH, Lin KC, Tsai ST, Chou P: Different association of hypertension and insulin-related metabolic syndrome between men and women in 8437 nondiabetic Chinese. *Am J Hypertens* 13:846-853, 2000
15. Lindblad U, Langer RD, Wingard DL, Thomas RG, Barrett-Connor EL: Metabolic syndrome and ischemic heart disease in elderly men and women. *Am J Epidemiol* 153:481-9, 2001
16. Hodge AM, Boyko EJ, de Courten M, Zimmet PZ, Chitson P, Tuomilehto J, Alberti KG: Leptin and other components of the Metabolic Syndrome in Mauritius--a factor analysis. *Int J Obes Relat Metab Disord* 25:126-31, 2001
17. Shmulewitz D, Auerbach SB, Lehner T, Blundell ML, Winick JD, Youngman LD, Skilling V, Heath SC, Ott J, Stoffel M, Breslow JL, Friedman JM: Epidemiology and factor analysis of obesity, type II diabetes, hypertension, and dyslipidemia (syndrome X) on the Island of Kosrae, Federated States of Micronesia. *Hum Hered* 51:8-19, 2001
18. Lakka HM, Laaksonen DE, Lakka TA, Niskanen LK, Kumpusalo E, Tuomilehto J, Salonen JT: The Metabolic Syndrome and Total and Cardiovascular Disease Mortality in Middle-aged Men. *JAMA* 288:2709-2716, 2002
19. Hanson RL, Imperatore G, Bennett PH, Knowler WC: Components of the "Metabolic Syndrome" and Incidence of Type 2 Diabetes. *Diabetes* 51:3120-3127, 2002
20. Hanley AJ, Karter AJ, Festa A, D'Agostino R, Jr., Wagenknecht LE, Savage P, Tracy RP, Saad MF, Haffner S: Factor analysis of metabolic syndrome using directly measured insulin sensitivity: The Insulin Resistance Atherosclerosis Study. *Diabetes* 51:2642-2647, 2002
21. Choi KM, Lee J, Kim KB, Kim DR, Kim SK, Shin DH, Kim NH, Park IB, Choi DS, Baik SH: Factor analysis of the metabolic syndrome among elderly Koreans--the South-west Seoul Study. *Diabet Med* 20:99-104, 2003

22. Howard BV, Criqui MH, Curb JD, Rodabough R, Safford MM, Santoro N, Wilson AC, Wylie-Rosett J: Risk factor clustering in the insulin resistance syndrome and its relationship to cardiovascular disease in postmenopausal white, black, hispanic, and Asian/Pacific Islander women. *Metabolism* 52:362-371, 2003
23. Zitzmann M, Gromoll J, Von Eckardstein A, Nieschlag E: The CAG repeat polymorphism in the androgen receptor gene modulates body fat mass and serum concentrations of leptin and insulin in men. *Diabetologia* 46:31-39, 2003
24. Hanley AJ, Festa A, D'Agostino RB, Wagenknecht LE, Savage PJ, Tracy RP, Saad MF, Haffner SM: Metabolic and inflammation variable clusters and prediction of type 2 diabetes: factor analysis using directly measured insulin sensitivity. *Diabetes* 53:1773-1781, 2004
25. Oh JY, Hong YS, Sung YA, Barrett-Connor E: Prevalence and Factor Analysis of Metabolic Syndrome in an Urban Korean Population. *Diabetes Care* 27:2027-2032, 2004
26. Austin MA, Edwards KL, McNeely MJ, Chandler WL, Leonetti DL, Talmud PJ, Humphries SE, Fujimoto WY: Heritability of multivariate factors of the metabolic syndrome in nondiabetic Japanese americans. *Diabetes* 53:1166-1169, 2004
27. Weiss R, Dziura J, Burgert TS, Tamborlane WV, Taksali SE, Yeckel CW, Allen K, Lopes M, Savoye M, Morrison J, Sherwin RS, Caprio S: Obesity and the Metabolic Syndrome in Children and Adolescents. *N Engl J Med* 350:2362-2374, 2004
28. Tang W, Miller MB, Rich SS, North KE, Pankow JS, Borecki IB, Myers RH, Hopkins PN, Leppert M, Arnett DK: Linkage analysis of a composite factor for the multiple metabolic syndrome: the National Heart, Lung, and Blood Institute Family Heart Study. *Diabetes* 52:2840-2847, 2003
29. Ford ES: Factor analysis and defining the metabolic syndrome. *Ethn.Dis.* 13:429-437, 2003
30. Salmenniemi U, Ruotsalainen E, Pihlajamaki J, Vauhkonen I, Kainulainen S, Punnonen K, Vanninen E, Laakso M: Multiple abnormalities in glucose and energy metabolism and coordinated changes in levels of adiponectin, cytokines, and adhesion molecules in subjects with metabolic syndrome. *Circulation* 110:3842-3848, 2004
